# Supplementary material for: Investigation of In-Vitro Adaptation toward Sodium Bituminosulfonate in Staphylococcus aureus
Source: PubMed Central journal article supplement (PMC7763802; doi:10.3390/microorganisms8121962), 2020-12-10
Supplement: microorganisms-08-01962-s001.pdf [file microorganisms-08-01962-s001.pdf]

**Table S1.** Minimum inhibitory concentration (MIC) values of the strains from the exposure to sub-inhibitory sodium bituminosulfonate concentrations over the course of ten passages on the active agent and after five recovery passages on plain plates (labeled with R). All MIC values in g/L.

| Strain     | MIC values determined after incubation of the strains on                      |                 |       |       |       |      |       |       |       |      |                   |                 |      |      |       |
|------------|-------------------------------------------------------------------------------|-----------------|-------|-------|-------|------|-------|-------|-------|------|-------------------|-----------------|------|------|-------|
|            | Agar plates containing sub-inhibitory sodium bituminosulfonate concentrations |                 |       |       |       |      |       |       |       |      | Plain agar plates |                 |      |      |       |
|            | Baseline                                                                      | P1 <sup>a</sup> | P2    | P3    | P4    | P5   | P6    | P7    | P8    | P9   | P10               | R1 <sup>b</sup> | R2   | R3   | R4    |
| ATCC 29213 | 0.125                                                                         | 0.125           | 0.25  | 0.5   | 0.5   | 0.5  | 0.5   | 0.5   | 1     | 1    | 1                 | 1               | 1    | 0.5  | 0.5   |
| ATCC 25923 | 0.25                                                                          | 0.25            | 0.25  | 0.25  | 0.5   | 0.5  | 0.5   | 0.5   | 1     | 1    | 1                 | 0.5             | 0.5  | 0.5  | 0.5   |
| ATCC 43400 | 0.125                                                                         | 0.125           | 0.25  | 0.25  | 0.25  | 0.25 | 0.5   | 0.5   | 0.5   | 0.5  | 0.5               | 0.5             | 0.5  | 0.25 | 0.25  |
| MOP4       | 0.25                                                                          | 1               | 1     | 1     | 1     | 2    | 1     | 2     | 2     | 1    | 2                 | 1               | 1    | 1    | 0.5   |
| MOP2       | 0.125                                                                         | 0.25            | 0.25  | 0.5   | 0.5   | 1    | 0.5   | 0.5   | 1     | 0.5  | 0.5               | 0.5             | 0.5  | 0.5  | 0.5   |
| MOP12      | 0.125                                                                         | 0.25            | 0.5   | 0.5   | 1     | 1    | 1     | 1     | 1     | 0.5  | 1                 | 1               | 0.5  | 0.25 | 0.25  |
| MOP14      | 0.06                                                                          | 0.125           | 0.25  | 0.25  | 0.5   | 0.5  | 0.5   | 0.5   | 0.5   | 0.5  | 1                 | 0.5             | 0.5  | 0.5  | 0.5   |
| MOP16      | 0.25                                                                          | 0.5             | 0.5   | 1     | 0.5   | 1    | 1     | 1     | 1     | 1    | 1                 | 1               | 1    | 1    | 1     |
| MOP18      | 0.06                                                                          | 0.125           | 0.25  | 0.25  | 0.25  | 0.25 | 0.25  | 0.25  | 0.25  | 0.5  | 0.25              | 0.25            | 0.25 | 0.25 | 0.25  |
| MOP20      | 0.125                                                                         | 0.25            | 0.5   | 1     | 0.5   | 1    | 0.5   | 1     | 1     | 1    | 1                 | 1               | 1    | 1    | 0.5   |
| MOP22      | 0.06                                                                          | 0.125           | 0.25  | 0.5   | 0.5   | 0.5  | 0.25  | 0.5   | 0.5   | 0.5  | 0.5               | 0.5             | 0.25 | 0.25 | 0.5   |
| MOP24      | 0.06                                                                          | 0.125           | 0.25  | 0.5   | 0.25  | 0.5  | 0.5   | 0.5   | 0.5   | 0.5  | 0.5               | 0.5             | 0.5  | 0.5  | 0.5   |
| MOP26      | 0.125                                                                         | 0.125           | 0.125 | 0.25  | 0.25  | 0.25 | 0.25  | 0.25  | 0.25  | 0.25 | 0.5               | 0.5             | 0.25 | 0.25 | 0.25  |
| 11-03      | 0.25                                                                          | 0.25            | 0.25  | 0.5   | 0.5   | 0.25 | 0.5   | 0.5   | 0.5   | 1    | 1                 | 1               | 0.5  | 0.5  | 0.5   |
| 11-15      | 0.25                                                                          | 0.25            | 0.25  | 0.5   | 0.25  | 0.25 | 0.25  | 0.5   | 0.5   | 0.5  | 1                 | 0.5             | 0.5  | 0.25 | 0.25  |
| 11-12      | 0.06                                                                          | 0.06            | 0.06  | 0.125 | 0.125 | 0.06 | 0.125 | 0.125 | 0.125 | 0.25 | 0.5               | 0.5             | 0.5  | 0.25 | 0.25  |
| 10-50      | 0.25                                                                          | 0.25            | 0.25  | 0.5   | 0.25  | 0.25 | 0.5   | 0.5   | 0.5   | 0.5  | 0.5               | 0.5             | 0.5  | 0.5  | 0.25  |
| 09-32      | 0.25                                                                          | 0.25            | 0.25  | 0.25  | 0.25  | 0.5  | 0.25  | 0.5   | 0.5   | 0.5  | 0.5               | 0.25            | 0.25 | 0.25 | 0.25  |
| 11-04      | 0.125                                                                         | 0.25            | 0.25  | 0.25  | 0.25  | 0.25 | 0.25  | 0.25  | 0.25  | 0.25 | 0.5               | 0.5             | 0.25 | 0.25 | 0.25  |
| 17-48      | 0.25                                                                          | 0.25            | 0.25  | 0.25  | 0.5   | 0.5  | 0.5   | 0.5   | 1     | 1    | 1                 | 1               | 1    | 1    | 0.5   |
| 10-17      | 0.25                                                                          | 0.25            | 0.25  | 0.5   | 0.25  | 0.25 | 0.25  | 0.5   | 0.5   | 0.5  | 1                 | 0.5             | 0.5  | 0.5  | 0.25  |
| 09-26      | 0.125                                                                         | 0.25            | 0.25  | 0.25  | 0.25  | 0.25 | 0.25  | 0.25  | 0.5   | 0.5  | 0.5               | 0.5             | 0.5  | 0.5  | 0.25  |
| 13-02      | 0.125                                                                         | 0.25            | 0.25  | 0.25  | 0.25  | 0.5  | 0.25  | 0.5   | 0.5   | 1    | 0.5               | 0.25            | 0.5  | 0.25 | 0.25  |
| 11-31      | 0.125                                                                         | 0.25            | 0.25  | 0.25  | 0.25  | 0.5  | 0.5   | 0.5   | 1     | 1    | 1                 | 0.5             | 0.5  | 0.25 | 0.25  |
| 30-38      | 0.25                                                                          | 0.25            | 0.25  | 0.25  | 0.25  | 0.25 | 0.5   | 0.5   | 1     | 1    | 1                 | 1               | 0.5  | 1    | 0.5   |
| 20-35      | 0.125                                                                         | 0.125           | 0.25  | 0.25  | 0.5   | 0.25 | 0.5   | 0.25  | 0.5   | 0.5  | 0.25              | 0.25            | 0.25 | 0.25 | 0.125 |
| LM380270   | 0.125                                                                         | 0.5             | 0.5   | 1     | 0.5   | 1    | 1     | 1     | 1     | 1    | 1                 | 1               | 0.5  | 0.5  | 0.5   |
| LM379438   | 0.125                                                                         | 0.25            | 0.5   | 0.25  | 0.25  | 0.5  | 0.5   | 0.5   | 1     | 1    | 1                 | 0.5             | 0.5  | 0.5  | 0.25  |
| LM297503   | 0.125                                                                         | 0.25            | 0.5   | 0.5   | 0.5   | 0.5  | 0.5   | 0.5   | 1     | 1    | 1                 | 1               | 0.5  | 0.5  | 0.5   |
| 023-7049   | 0.125                                                                         | 0.25            | 0.5   | 1     | 1     | 1    | 1     | 1     | 1     | 1    | 1                 | 0.5             | 0.5  | 0.5  | 0.5   |

<sup>a</sup>Passages on plates containing a linear gradient of the microbial agent. <sup>b</sup>Passages on plain agar plates.

**Table S2.** MIC values of the strains from the exposure to sub-inhibitory fusidic acid concentrations over the course of ten passages on the active agent and after five recovery passages on plain plates (labeled with R). All MIC values in mg/L.

| Strain     | MIC values determined after incubation of the strains on          |       |      |     |    |    |    |    |    |    |                   |    |    |    |    |    |
|------------|-------------------------------------------------------------------|-------|------|-----|----|----|----|----|----|----|-------------------|----|----|----|----|----|
|            | Agar plates containing sub-inhibitory fusidic acid concentrations |       |      |     |    |    |    |    |    |    | Plain agar plates |    |    |    |    |    |
|            | Baseline                                                          | P1    | P2   | P3  | P4 | P5 | P6 | P7 | P8 | P9 | P10               | R1 | R2 | R3 | R4 | R5 |
| ATCC 29213 | 0.125                                                             | 2     | 8    | 16  | 8  | 8  | 8  | 16 | 16 | 16 | 16                | 16 | 16 | 16 | 16 | 16 |
| ATCC 25923 | 0.125                                                             | 2     | 2    | 2   | 8  | 8  | 8  | 8  | 8  | 16 | 16                | 8  | 8  | 16 | 8  | 8  |
| ATCC 43300 | 0.06                                                              | 8     | 8    | 16  | 16 | 8  | 16 | 16 | 16 | 16 | 16                | 16 | 16 | 16 | 16 | 16 |
| MOP4       | 0.06                                                              | 0.125 | 0.25 | 2   | 4  | 4  | 8  | 8  | 8  | 8  | 8                 | 8  | 4  | 4  | 8  | 8  |
| MOP2       | 0.06                                                              | 0.125 | 0.25 | 0.5 | 2  | 1  | 1  | 2  | 1  | 1  | 1                 | 2  | 2  | 2  | 2  | 2  |
| 11-03      | 0.125                                                             | 0.25  | 2    | 4   | 4  | 4  | 4  | 2  | 4  | 8  | 8                 | 16 | 8  | 8  | 8  | 8  |

<sup>a</sup>Passages on plates containing a linear gradient of the microbial agent. <sup>b</sup>Passages on plain agar plates.

Table S3. Clinical strain collection used in the study.

| Strain   | <i>spa</i> -type | Methicillin resistance phenotype ( <i>mec</i> gene type) | Source |
|----------|------------------|----------------------------------------------------------|--------|
| MOP4     | t150             | PSSA-MSSA (n.d.)                                         | [33]   |
| MOP2     | (11–17–12–17)    | PRSA-MSSA (n.d.)                                         | [33]   |
| MOP12    | t002             | PRSA-MSSA (n.d.)                                         | [33]   |
| MOP14    | t1909            | PRSA-MSSA (n.d.)                                         | [33]   |
| MOP16    | t084             | PRSA-MSSA (n.d.)                                         | [33]   |
| MOP18    | t021             | PRSA-MSSA (n.d.)                                         | [33]   |
| MOP20    | t548             | PRSA-MSSA (n.d.)                                         | [33]   |
| MOP22    | t949             | PRSA-MSSA (n.d.)                                         | [33]   |
| MOP24    | t298             | PRSA-MSSA (n.d.)                                         | [33]   |
| MOP26    | t015             | PRSA-MSSA (n.d.)                                         | [33]   |
| 11–03    | t003             | HA-MRSA ( <i>mecA</i> )                                  | [34]   |
| 11–15    | t032             | HA-MRSA ( <i>mecA</i> )                                  | [34]   |
| 11–12    | t008             | HA-MRSA ( <i>mecA</i> )                                  | [34]   |
| 10–50    | t002             | HA-MRSA ( <i>mecA</i> )                                  | [34]   |
| 09–32    | t045             | HA-MRSA ( <i>mecA</i> )                                  | [34]   |
| 11–04    | t004             | HA-MRSA ( <i>mecA</i> )                                  | [34]   |
| 17–48    | t014             | HA-MRSA ( <i>mecA</i> )                                  | [34]   |
| 10–17    | t041             | HA-MRSA ( <i>mecA</i> )                                  | [34]   |
| 09–26    | t022             | HA-MRSA ( <i>mecA</i> )                                  | [34]   |
| 13–02    | t038             | HA-MRSA ( <i>mecA</i> )                                  | [34]   |
| 11–31    | t044             | PVL-positive CA-MRSA ( <i>mecA</i> )                     | [34]   |
| 30–38    | t008             | PVL-positive CA-MRSA ( <i>mecA</i> )                     | [34]   |
| 20–35    | t693             | PVL-positive CA-MRSA ( <i>mecA</i> )                     | [34]   |
| LM380270 | t011             | LA-MRSA ( <i>mecA</i> )                                  | [35]   |
| LM379438 | t034             | LA-MRSA ( <i>mecA</i> )                                  | [35]   |
| LM297503 | t108             | LA-MRSA ( <i>mecA</i> )                                  | [35]   |
| 023–7049 | t843             | LA-MRSA ( <i>mecC</i> )                                  | [36]   |

MSSA, methicillin-susceptible *S. aureus*; PSSA, penicillin-susceptible *S. aureus*; PRSA, penicillin-resistant *S. aureus*; MRSA, methicillin-resistant *S. aureus*; HA-MRSA, healthcare-associated *S. aureus*; CA-MRSA, community acquired *S. aureus*; PVL-pos, Panton Valentine leucocidin positive; LA-MRSA, livestock associated *S. aureus*; n.d., not detected.

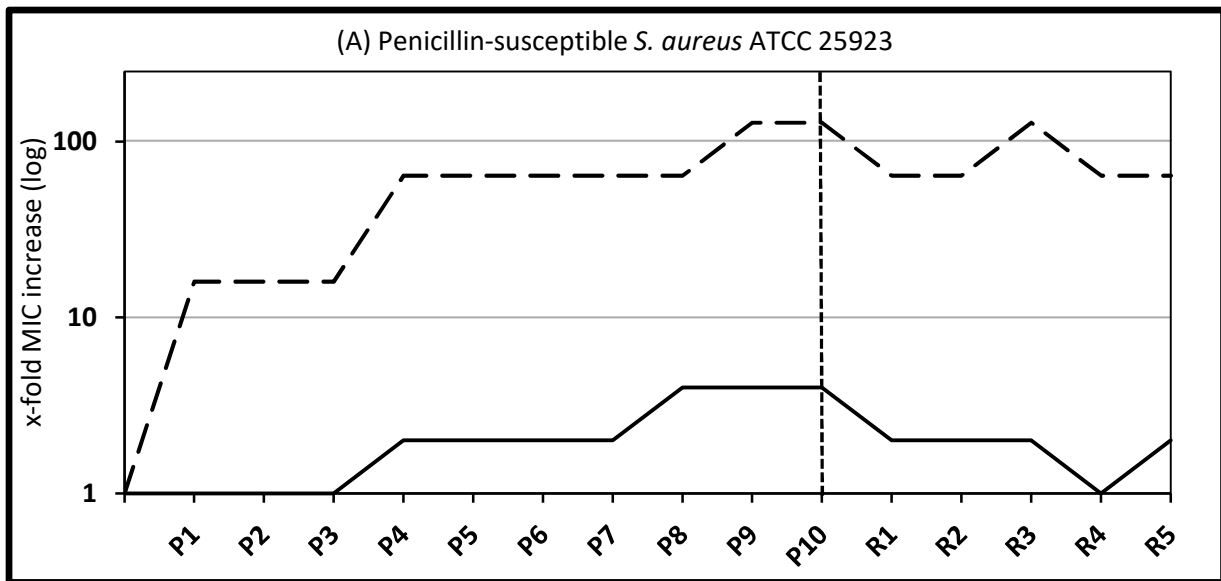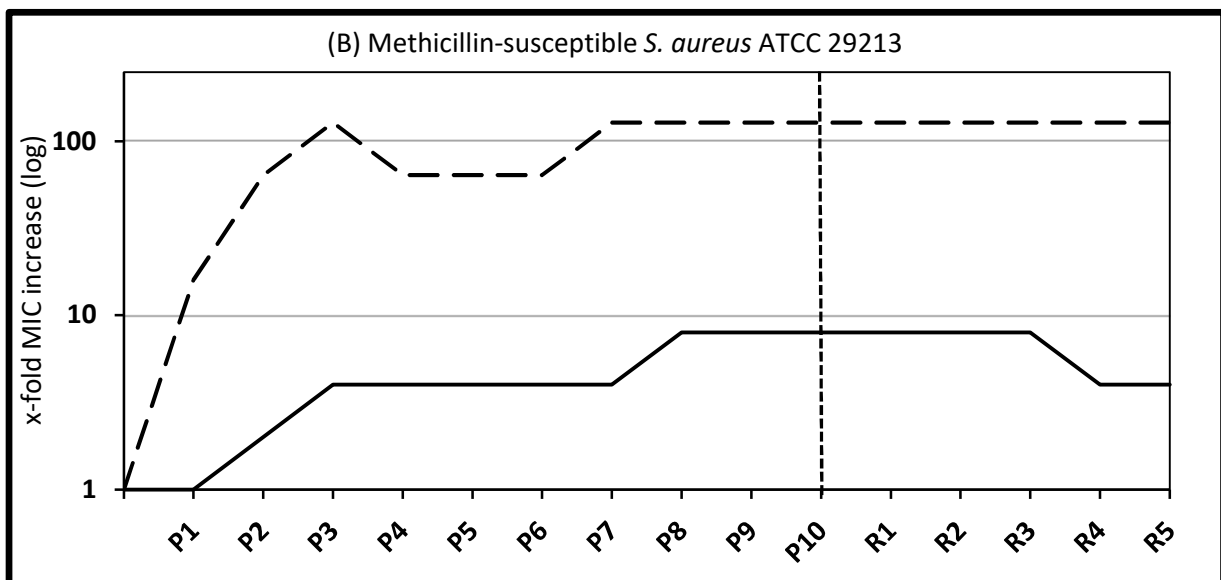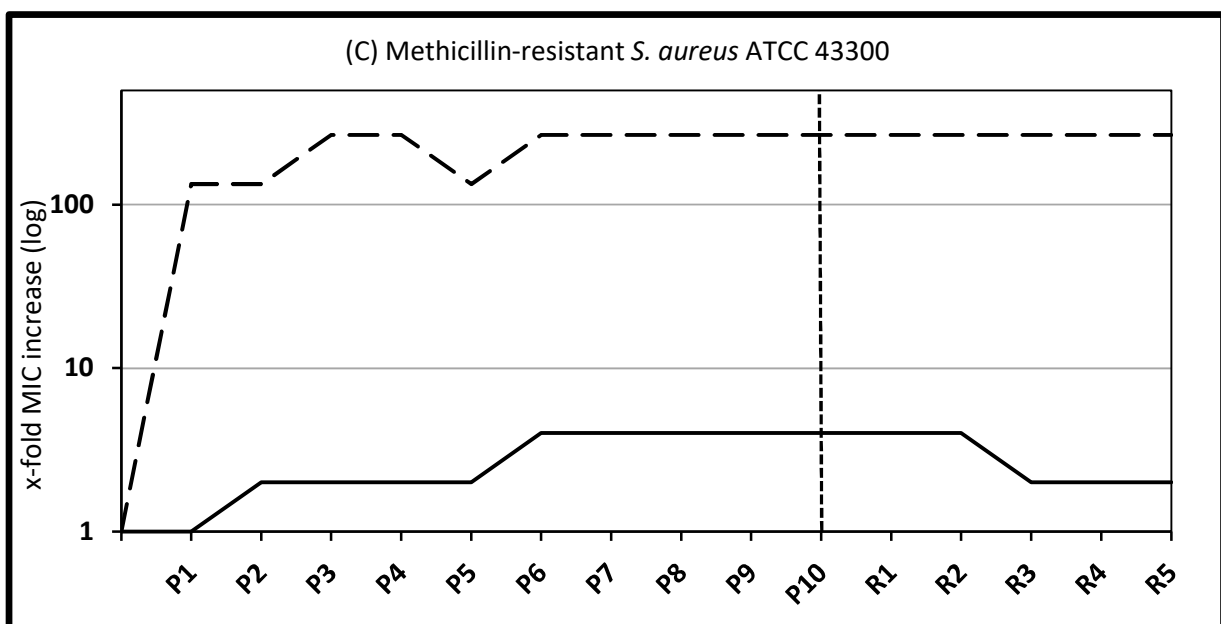

**Figure S1.** Data from the penicillin-susceptible (**A**), methicillin-susceptible (**B**) and methicillin-resistant (**C**) reference strains exposed to ten passages of sodium bituminosulfonate (solid line) and fusidic acid (dashed line) on linear gradient plates. The dotted vertical line indicates the endpoint after ten passages on linear gradient plates containing the active agents (labeled with P) and five recovery passages on plain agar plates (labeled with R).

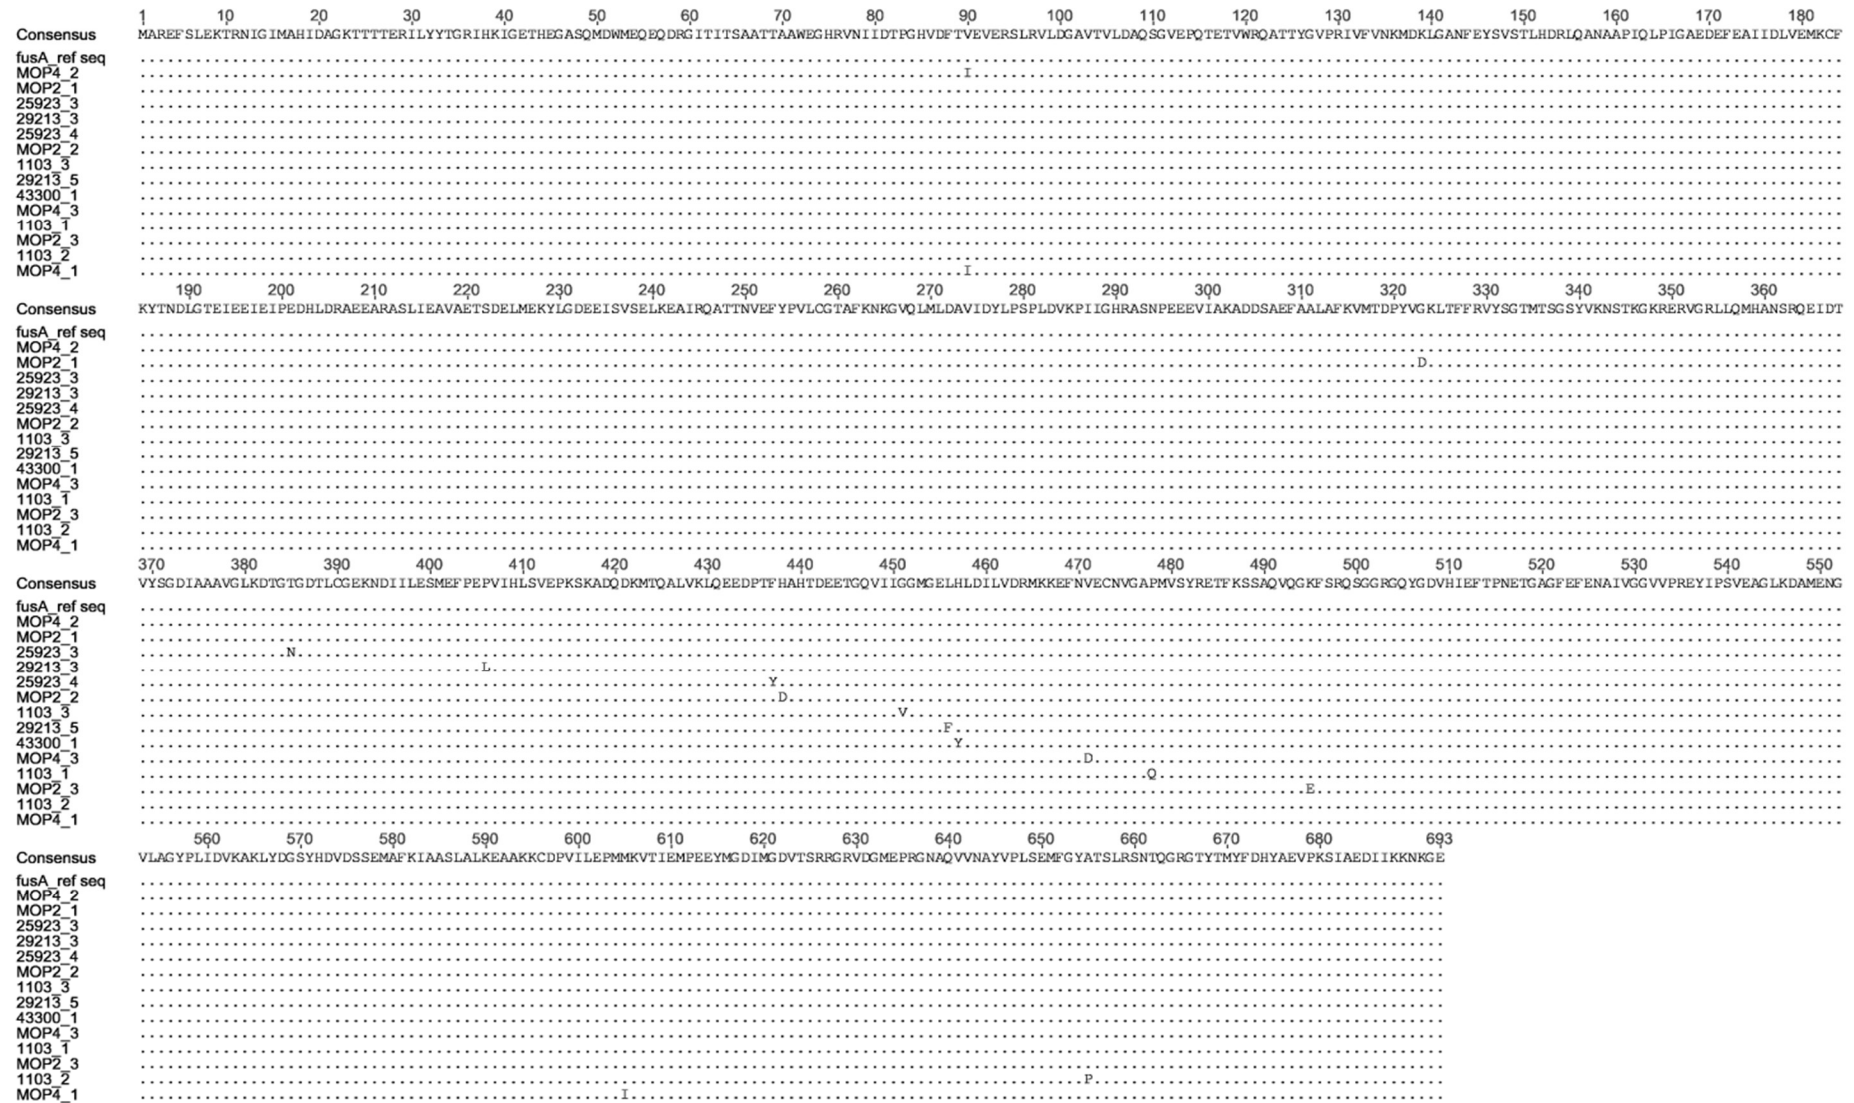

Figure S2. Pairwise alignment of obtained polymorphisms within the *fusA* gene from the screening for resistance mechanism.

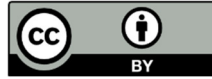

© 2020 by the author. Licensee MDPI, Basel, Switzerland. This article is an open access article distributed under the terms and conditions of the Creative Commons Attribution (CC BY) license (<http://creativecommons.org/licenses/by/4.0/>).
